# Supplementary material for: One-step synthesis of Au nanoparticle–graphene composites using tyrosine: electrocatalytic and catalytic properties
Source: Royal Society of Chemistry journal article supplement (doi:10.1039/c5nj03532e), 2016-01-01
Supplement: c5nj03532e1.pdf [file c5nj03532e1.pdf]

## Supporting information

### **One-step synthesis of Au nanoparticles-graphene composite using tyrosine:**

#### **Electrocatalytic and catalytic properties**

Qi Wang,<sup>1,2</sup> Qian Wang,<sup>1,2</sup> Musen Li,<sup>1</sup> Sabine Szunerits<sup>2</sup> and Rabah Boukherroub<sup>2\*</sup>

*<sup>1</sup>Key Laboratory for Liquid-Solid Structural Evolution and Processing of Materials,  
Shandong University, Jinan 250061, China*

*<sup>2</sup>Institut d'Electronique, de Microélectronique et de Nanotechnologie (IEMN), UMR CNRS  
8520, Université Lille1, Avenue Poincaré, BP 60069, 59652 Villeneuve d'Ascq, France*

*E-mail: [rabah.boukherroub@iemn.univ-lille1.fr](mailto:rabah.boukherroub@iemn.univ-lille1.fr)*

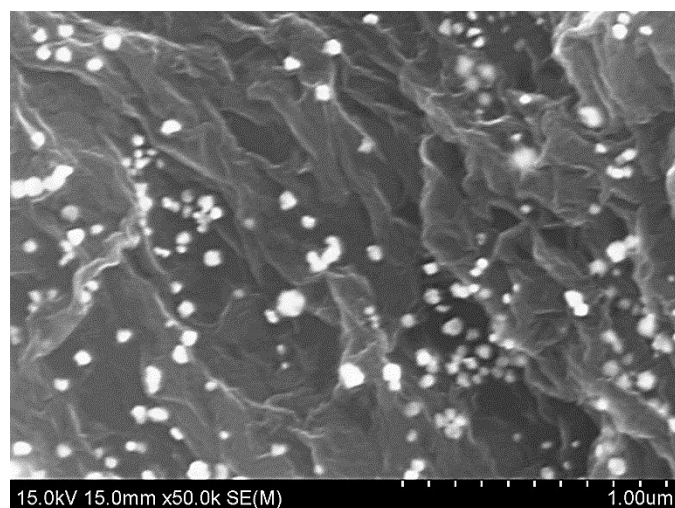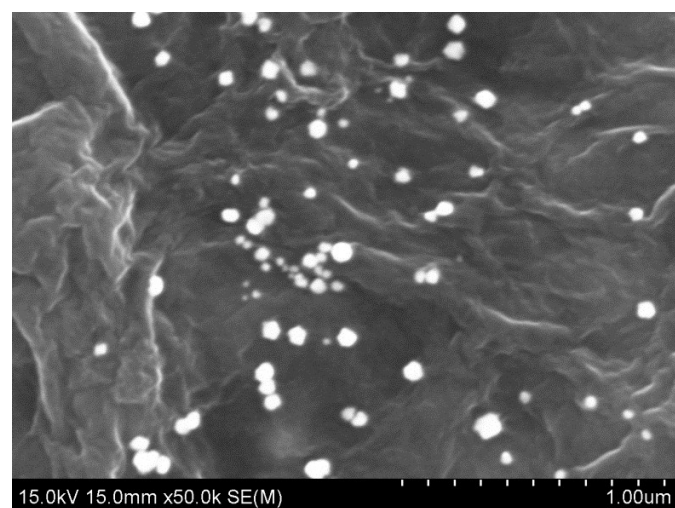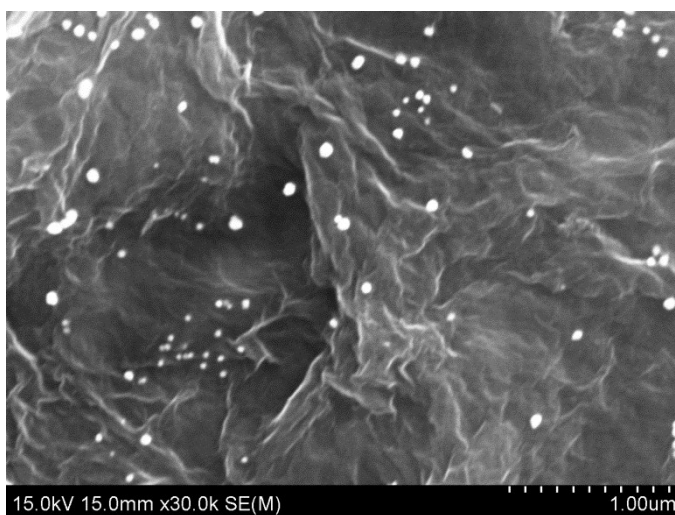

**Figure S1.** SEM images of the rGO/Au NPs/Tyr nanocomposite.

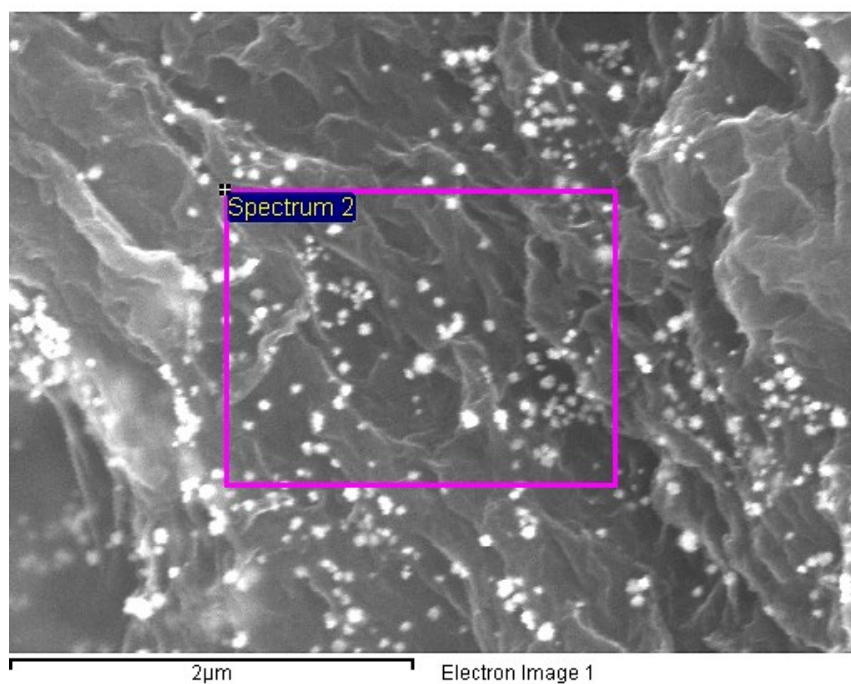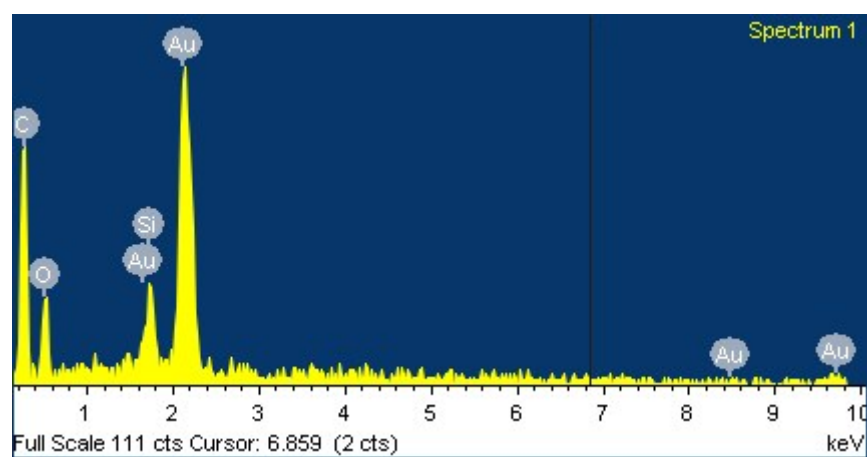

| Element | Weight % | Atomic% |
|---------|----------|---------|
| C K     | 38.51    | 73.69   |
| O K     | 14.50    | 20.83   |
| Au M    | 46.99    | 5.48    |
| Totals  | 100.00   | 100.00  |

**Figure S2.** SEM and EDX analysis of rGO/Au NPs/Tyr.

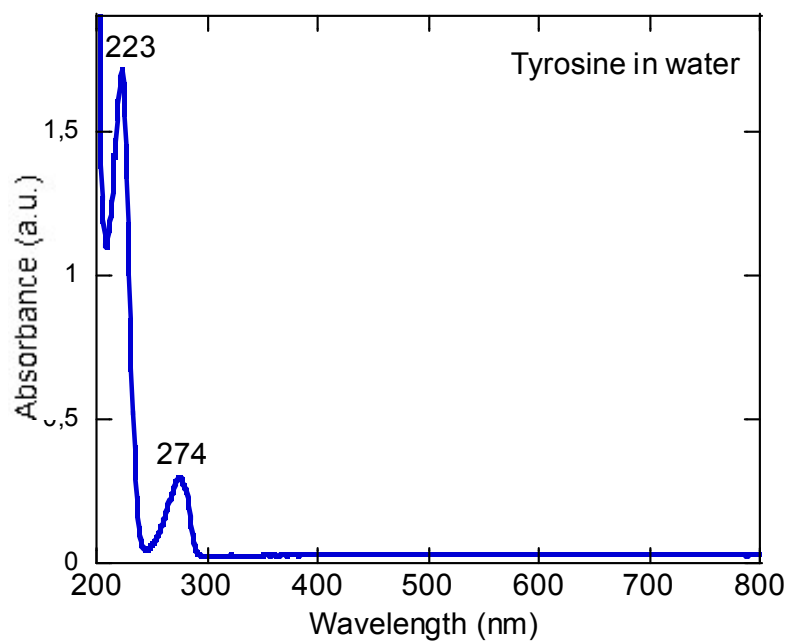

**Figure S3.** UV/Vis absorption spectrum of tyrosine (50  $\mu\text{M}$ ) in water

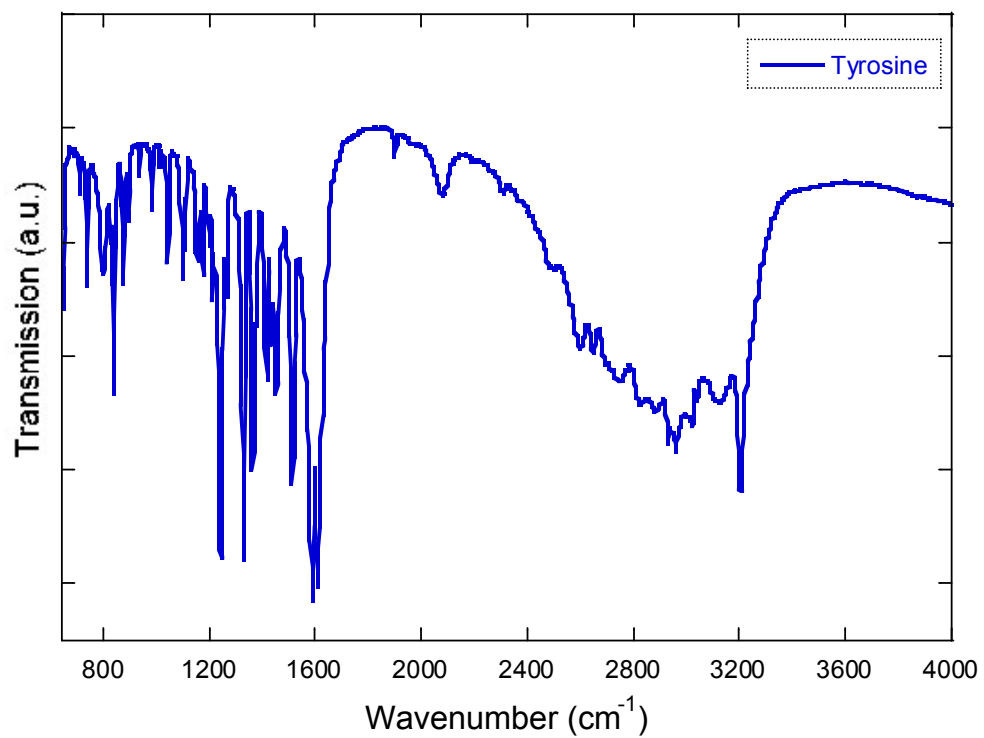

**Figure S4:** Transmission FTIR spectrum of tyrosine.

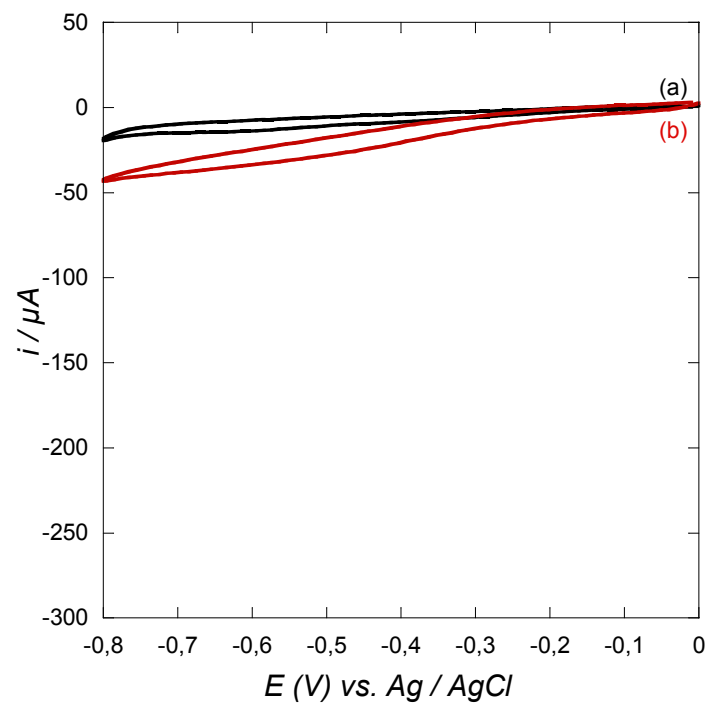

**Figure S5:** Cyclic voltammograms of GC electrode in  $\text{N}_2$ -saturated 0.1 M PBS solution (pH 7.4) in the absence (a) and presence (b) of 10 mM  $\text{H}_2\text{O}_2$ ; scan rate: 50 mV/s.

**Table S1.** Comparison of analytical performance of other Au NPs/rGO-based non-enzymatic H<sub>2</sub>O<sub>2</sub> sensors

| Electrode                            | Detection limit ( $\mu\text{M}$ ) | Sensitivity ( $\mu\text{A mM}^{-1} \text{cm}^{-2}$ ) | Linear range (mM) | Ref. |
|--------------------------------------|-----------------------------------|------------------------------------------------------|-------------------|------|
| AuNPs/PDDA/rGO/GC <sup>a</sup>       | 0.44                              | -                                                    | 0.0005-0.5        | 1    |
| Au NPs/SGS/GC <sup>b</sup>           | 0.25                              | 3.21                                                 | 2.3-16            | 2    |
| AuNPs/rGO paper                      | 2                                 | 236.8                                                | 0.005-8.6         | 3    |
| AuNPs/rGO/GC                         | 6                                 | 3                                                    | 0.020-0.280       | 4    |
| AuNPs/POM/rGO <sup>c</sup>           | 1.54                              | 58.87                                                | 0.005-18          | 5    |
| AuNPs/EPG/FTO <sup>d</sup>           | 0.1                               | 75.9                                                 | 0.0005-4.9        | 6    |
| rGO/Nafion/AzI/AuNPs/GC <sup>e</sup> | 10                                | -                                                    | 0.03-5            | 7    |
| AuNPs/MnO <sub>2</sub> /rGO/GC       | 0.05                              | 980                                                  | 0.022-12.6        | 8    |
| PtAuNPs/rGO/CNTs <sup>f</sup>        | 0.6                               | 313.4                                                | 0.002-8.561       | 9    |
| AuNPs/rGO/GC membrane                | 6.2                               | 5.3                                                  | 0.25-22.5         | 10   |
| Ag-Au-rGO/GC                         | 1                                 | -                                                    | 0.1-5             | 11   |
| Au-MWCNTs-sG@GCE <sup>g</sup>        | 13                                | -                                                    | 1-62              | 12   |
| AuNPs/rGO/GCE                        | 1.5                               | -                                                    | 0.1-9             | 13   |
| Au NPs-Gr                            | 0.03                              | -                                                    | 0.0001-0.07       | 14   |
| Au NPs-N-GQDs <sup>h</sup>           | 0.12                              | 186.22                                               | 0.00025-13.327    | 15   |

rGO: reduced graphene oxide

Au NPs: gold nanoparticles

<sup>a</sup>PDDA: poly(diallyldimethyl ammonium chloride)

<sup>b</sup>SGS: sulfonated graphene sheets

<sup>c</sup>POM: polyoxometalate

<sup>d</sup>EPG: embedded porous graphene

<sup>e</sup>AzI: Azur I

<sup>f</sup>CNTs: carbon nanotubes

<sup>g</sup>MWCNTs-sG: Au nanoparticles-decorated multiwalled carbon nanotube-solar exfoliated graphene

<sup>h</sup>Au NPs-N-GQDs: Au nanoparticles (Au NPs) on nitrogen-doped graphene quantum dots

**Table S2.** Comparison of catalytic performance of Au NPs/rGO-based catalysts for the reduction of nitrophenol

| Catalyst                                                             | Rate constant                                 | Reference |
|----------------------------------------------------------------------|-----------------------------------------------|-----------|
| Au nanoparticles/GO                                                  | $18.8 \times 10^{-2} \text{ min}^{-1}$        | 16        |
| Au nanoplates/GO                                                     | $4.67 \times 10^{-2} \text{ min}^{-1}$        |           |
| Au/rGO hybrid nanostructures                                         | $0.309 \text{ min}^{-1}$                      | 17        |
| GO-Fe <sub>3</sub> O <sub>4</sub> /Au NPs                            | $3.22 \times 10^{-2} \text{ s}^{-1}$          | 18        |
| Au-PRGO                                                              | $8.77 \times 10^{-3} \text{ s}^{-1}$          | 19        |
| rGO-Au hybrid film                                                   | $3.33 \text{ s}^{-1} \text{ g}^{-1}$          | 20        |
| Au-Ag/GO                                                             | $3 \times 10^3 \text{ s}^{-1} \text{ g}^{-1}$ | 21        |
| GO/SiO <sub>2</sub> /Au NPs                                          | $1.04 \text{ min}^{-1}$                       | 22        |
| AuNPs/TWEEN/GO                                                       | $25.37 \times 10^{-2} \text{ min}^{-1}$       | 23        |
| AuNP/PQ11/GN                                                         | $30.58 \times 10^{-2} \text{ min}^{-1}$       | 24        |
| Au/GO                                                                | $0.368 \text{ min}^{-1}$                      | 25        |
| Au/graphene hydrogel                                                 | $31.7 \text{ s}^{-1} \text{ g}^{-1}$          | 26        |
| Au/SRG                                                               | $60 \text{ h}^{-1}$                           | 27        |
| graphene/PDA-Au                                                      | $0.12\text{-}0.225 \text{ min}^{-1}$          | 28        |
| GO-N/Au                                                              | $0.11\text{-}0.15 \text{ min}^{-1}$           | 29        |
| Au/TP-GS                                                             | $0.939 \times 10^{-2} \text{ s}^{-1}$         | 30        |
| Au/PDIL-GS                                                           | $6.72 \times 10^{-3} \text{ s}^{-1}$          | 31        |
| Au-NPs@NH <sub>2</sub> /GNS-PO <sub>3</sub> H <sub>2</sub> composite | $0.325 \text{ min}^{-1}$                      | 32        |
| bio-AuNPs/rGO                                                        | $138.45 \text{ s}^{-1} \text{ M}^{-1}$        | 33        |
| Au@HGN                                                               | $1.12 \text{ min}^{-1}$                       | 34        |

Au-PRGO: Au nanoparticles-partially reduced graphene oxide

GN: graphene nanosheets

PQ11: poly [(2-ethyl dimethyl ammonioethyl methacrylate ethyl sulfate)-co-(1-vinylpyrrolidone)]

Au/SRG: Au decorated thiol-functionalized reduced graphene oxide

PDA: polydopamine

Au/TP-GS: Au nanoparticles anchored to thiophenol covalently functionalized graphene sheets

Au/PDIL-GS: Ionic liquid of 3,4,9,10-perylenetetracarboxylic acid-noncovalent functionalized graphene

Au-NP@NH<sub>2</sub>: amine-functionalized Au-NP

GNS-PO<sub>3</sub>H<sub>2</sub>: phosphonate-functionalized graphene nanosheets

HGN: hollow graphene nanoshell

## References

- <sup>1</sup> Y. Fang, S. Guo, C. Zhu, Y. Zhai, and E. Wang, *Langmuir*, 2010, **26**, 11277-11282.
- <sup>2</sup> S. J. Li, Y. F. Shi, L. Liu, L. X. Song, H. Pang, and J. M. Du, *Electrochim. Acta*, 2012, **85**, 628-635.
- <sup>3</sup> F. Xiao, J. Song, H. Gao, X. Zan, R. Xu, and H. Duan, *ACS Nano*, 2012, **6**, 100-110.
- <sup>4</sup> J. Hu, F. Li, K. Wang, D. Han, Q. Zhang, J. Yuan, and L. Niu, *Talanta*, 2012, **93**, 345-349.
- <sup>5</sup> R. Liu, S. Li, X. Yu, G. Zhang, S. Zhang, J. Yao, B. Keita, L. Nadjo, and L. Zhi, *Small*, 2012, **8**, 1398-1406.
- <sup>6</sup> Q. Xi, X. Chen, D. G. Evans, and W. Yang, *Langmuir*, 2012, **28**, 9885-9892.
- <sup>7</sup> Y. Zhang, Y. Liu, J. He, P. Pang, Y. Gao, and Q. Hu, *Electrochim. Acta*, 2013, **90**, 550-555.
- <sup>8</sup> L. Wang, M. Deng, G. Ding, S. Chen, and F. Xu, *Electrochim. Acta*, 2013, **114**, 416-423.
- <sup>9</sup> D. Lu, Y. Zhang, S. Lin, L. Wang, and C. Wang, *Talanta*, 2013, **112**, 111-116.
- <sup>10</sup> P. Zhang, X. Zhang, S. Zhang, X. Lu, Q. Li, Z. Su, and G. Wei, *J. Mater. Chem. B*, 2013, **1**, 6525-6531.
- <sup>11</sup> G. G. Gnana kumar, K. J. Babu, K. S. Nahm, and Y. J. Hwang, *RSC Adv.*, 2014, **4**, 7944-7951.
- <sup>12</sup> P. Nayak, P. N. Santhosh, and S. Ramaprabhu, *RSC Adv.*, 2014, **4**, 41670-41677.
- <sup>13</sup> X. Qin, Q. Li, A. M. Asiri, A. O. Al-Youbi, and X. Sun, *Gold Bull.*, 2014, **47**, 3-8.
- <sup>14</sup> H. Liu, X. Su, C. Duan, X. Dong, S. Zhou, and Z. Zhu, *J. Electroanal. Chem.*, 2014, **731**, 36-42.
- <sup>15</sup> J. Ju and W. Chen, *Anal. Chem.*, 2015, **87**, 1903-1910.
- <sup>16</sup> Y. Zhang, S. Liu, W. Lu, L. Wang, J. Tian, and X. Sun, *Catal. Sci. Technol.*, 2011, **1**, 1142-1144.
- <sup>17</sup> B. K. Barman and K. K. Nanda, *Chem. Commun.*, 2013, **49**, 8949-8951.



- 18 J. Hu, Y.-l. Dong, X.-j. Chen, H.-j. Zhang, J.-m. Zheng, Q. Wang, and X.-g. Chen, *Chem. Eng. J.*, 2014, **236**, 1-8.
- 19 M.-Q. Yang, X. Pan, N. Zhang, and Y.-J. Xu, *CrystEngComm*, 2013, **15**, 6819-6828.
- 20 K. Bramhaiah and N. S. John, *RSC Adv.*, 2013, **3**, 7765-7773.
- 21 T. Wu, J. Ma, X. Wang, Y. Liu, H. Xu, J. Gao, W. Wang, Y. Liu, and J. Yan, *Nanotechnology*, 2013, **24**, 125301.
- 22 C. Zhu, L. Han, P. Hu, and S. Dong, *Nanoscale*, 2012, **4**, 1641-1646.
- 23 W. Lu, R. Ning, X. Qin, Y. Zhang, G. Chang, S. Liu, Y. Luo, and X. Sun, *J. Hazard. Mater.*, 2011, **197**, 320-326.
- 24 X. Qin, W. Lu, Y. Luo, G. Chang, A. M. Asiri, A. O. Al-Youbi, and X. Sun, *J. Nanosci. Nanotechnol.*, 2012, **12**, 1-7.
- 25 T. Wu, L. Zhang, J. Gao, Y. Liu, C. Gao, and J. Yan, *J. Mater. Chem. A*, 2013, **1**, 7384-7390.
- 26 J. Li, C.-y. Liu, and Y. Liu, *J. Mater. Chem.*, 2012, **22**, 8426-8430.
- 27 W. Liu, D. Sun, J. Fu, R. Yuan, and Z. Li, *RSC Adv.*, 2014, **4**, 11003-11011.
- 28 J. Luo, N. Zhang, R. Liu, and X. Liu, *RSC Adv.*, 2014, **4**, 64816-64824.
- 29 H. Yao, T.-C. Huang, and H.-J. Sue, *RSC Adv.*, 2014, **4**, 61823-61830.
- 30 R. Ren, S. Li, J. Li, J. Ma, H. Liu, and J. Ma, *Catal. Sci. Technol.*, 2015, **5**, 2149-2156.
- 31 S. Li, S. Guo, H. Yang, G. Gou, R. Ren, J. Li, Z. Dong, J. Jin, and J. Ma, *J. Hazard. Mater.*, 2014, **270**, 11-17.
- 32 X. Gao, G. Xu, Y. Zhao, S. Li, F. Shi, and Y. Chen, *RSC Adv.*, 2015, **5**, 88045-88051.
- 33 B. Dong, G. Liu, J. Zhou, A. Wang, J. Wang, R. Jin, and H. Lv, *RSC Adv.*, 2015, **5**, 97798-97806.
- 34 H. Liu, J. Wang, Z. Feng, Y. Lin, L. Zhang, and D. Su, *small*, 2015, **11**, 5059-5064.
